# Supplementary material for: Epistasis for Growth Rate and Total Metabolic Flux in Yeast
Source: PubMed Central journal article supplement (PMC3295780; doi:10.1371/journal.pone.0033132), 2012-03-06

Sup. Fig 1

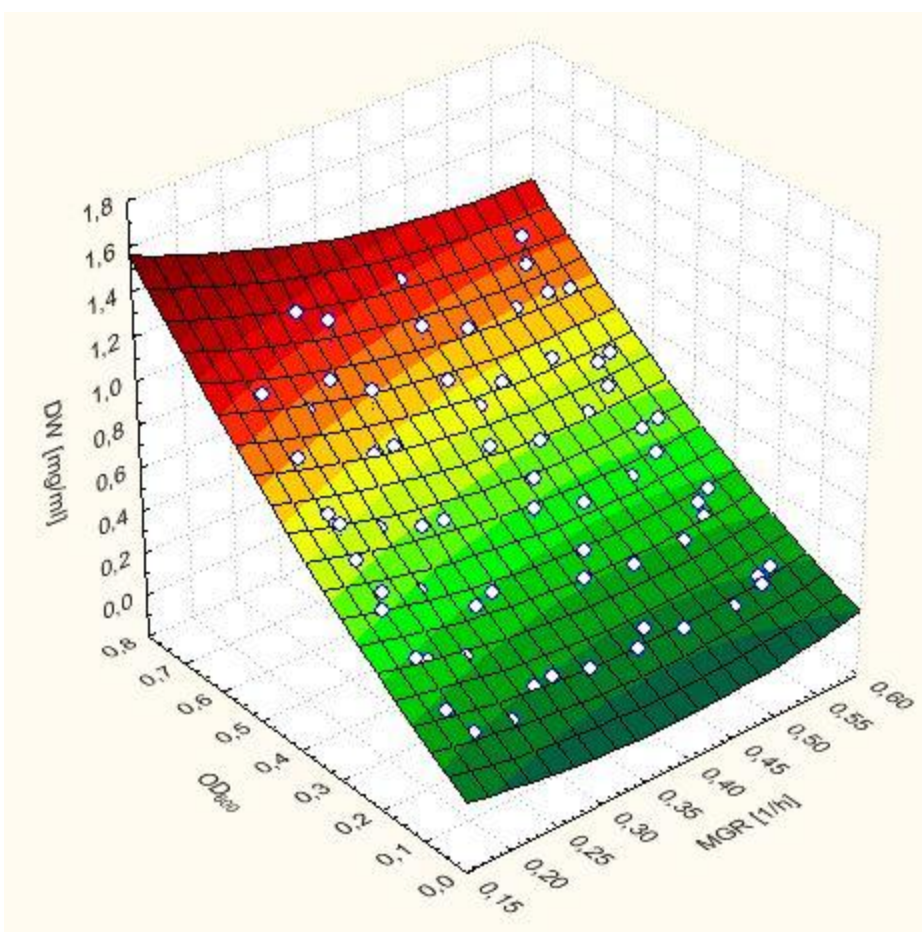

Supplement: pone.0033132.s001.pdf [file pone.0033132.s001.pdf]
