# Supplementary material for: Epistasis for Growth Rate and Total Metabolic Flux in Yeast
Source: PubMed Central journal article supplement (PMC3295780; doi:10.1371/journal.pone.0033132), 2012-03-06
Supplement: pone.0033132.s002.pdf [file pone.0033132.s002.pdf]

| Deletion  | Dry mass / Glucose consumed |        |        |        |          | Maximum Growth Rate [1/h] |        |        |        |          |
|-----------|-----------------------------|--------|--------|--------|----------|---------------------------|--------|--------|--------|----------|
|           | YPD                         |        |        |        |          | YPD                       |        |        |        |          |
|           | YPD                         | 36C    | SD     | Saline | Caffeine | YPD                       | 36C    | SD     | Saline | Caffeine |
| YDR347W   | 0.1132                      | 0.0918 | 0.0777 | 0.0795 | 0.0924   | 0.4041                    | 0.4199 | 0.2721 | 0.2890 | 0.2624   |
| YMR287C   | 0.1111                      | 0.1079 | 0.0768 | 0.0801 | 0.0948   | 0.4431                    | 0.5198 | 0.3378 | 0.1835 | 0.2845   |
| YPR101W   | 0.1381                      | 0.1487 | 0.0945 | 0.1292 | 0.1202   | 0.3123                    | 0.3268 | 0.3186 | 0.1967 | 0.2069   |
| YEL024W   | 0.1331                      | 0.1540 | 0.1058 | 0.1119 | 0.0895   | 0.4235                    | 0.4409 | 0.3145 | 0.2663 | 0.3090   |
| YKR024C   | 0.1340                      |        | 0.0577 |        | 0.0577   | 0.4118                    |        | 0.3192 |        | 0.2347   |
| YEL050C   | 0.1031                      | 0.1139 | 0.0691 | 0.0930 | 0.1067   | 0.3715                    | 0.3893 | 0.2291 | 0.2139 | 0.2535   |
| YCR081W   | 0.1267                      | 0.1375 | 0.0755 | 0.1006 | 0.1029   | 0.2507                    | 0.5421 | 0.2548 | 0.1967 | 0.1430   |
| YEL054C   | 0.1278                      | 0.1456 | 0.0956 | 0.1199 | 0.1344   | 0.3353                    | 0.2904 | 0.3243 | 0.2012 | 0.2152   |
| YAL026C   | 0.1111                      | 0.0916 | 0.0911 | 0.1245 | 0.1037   | 0.3298                    | 0.3367 | 0.3449 | 0.3010 | 0.2252   |
| YNL138W   | 0.1212                      | 0.1175 | 0.1036 | 0.1416 | 0.1176   | 0.4182                    | 0.3070 | 0.3073 | 0.1945 | 0.2165   |
| YPL234C   | 0.1156                      | 0.1135 | 0.1025 | 0.0995 | 0.1031   | 0.3996                    | 0.4537 | 0.3397 | 0.1806 | 0.1513   |
| YHL027W   | 0.1208                      | 0.1004 | 0.0864 | 0.0922 | 0.1150   | 0.2872                    | 0.3634 | 0.2456 | 0.1621 | 0.1698   |
| YJR134C   | 0.1321                      | 0.1069 |        | 0.0869 |          | 0.2982                    | 0.2108 |        | 0.0914 |          |
| YER014C-A | 0.1188                      | 0.1228 | 0.0752 | 0.1190 | 0.0954   | 0.4281                    | 0.4691 | 0.3421 | 0.2758 | 0.3443   |
| YHR026W   | 0.1245                      | 0.1300 | 0.0798 | 0.1119 | 0.0967   | 0.3230                    | 0.4509 | 0.3540 | 0.3569 | 0.2312   |
| YFR001W   | 0.1303                      | 0.1304 | 0.0862 | 0.1269 | 0.1063   | 0.3888                    | 0.4314 | 0.2984 | 0.2755 | 0.3105   |
| YKR092C   | 0.1262                      | 0.1269 | 0.0773 | 0.1086 | 0.0806   | 0.3851                    | 0.3448 | 0.4181 | 0.2701 | 0.2838   |
| YAL021C   | 0.1422                      | 0.1465 | 0.1010 |        | 0.1049   | 0.3519                    | 0.4075 | 0.2596 |        | 0.2833   |
| YDR495c   | 0.1233                      | 0.1072 | 0.0981 | 0.1016 | 0.1034   | 0.3170                    | 0.3475 | 0.2175 | 0.2738 | 0.2163   |
| YLR448W   | 0.1390                      | 0.1301 | 0.0858 | 0.0982 | 0.1012   | 0.3090                    | 0.2755 | 0.2737 | 0.0863 | 0.2426   |
| YMR060C   | 0.1104                      | 0.1102 | 0.0796 | 0.0941 | 0.1010   | 0.4253                    | 0.4266 | 0.2503 | 0.1877 | 0.2689   |
| YBR251W   | 0.1028                      | 0.1122 | 0.0964 | 0.1024 | 0.1242   | 0.3538                    | 0.4238 | 0.2344 | 0.2152 | 0.2350   |
| YDL191W   | 0.1353                      | 0.1231 | 0.0817 | 0.1163 | 0.1046   | 0.3758                    | 0.3826 | 0.2894 | 0.2718 | 0.2579   |
| YDL192W   | 0.1173                      | 0.1238 | 0.0761 | 0.1084 | 0.0836   | 0.3951                    | 0.4408 | 0.2987 | 0.2292 | 0.2313   |
| YDR028C   | 0.0949                      | 0.1003 | 0.0850 | 0.0815 | 0.0829   | 0.4045                    | 0.4945 | 0.3177 | 0.2961 | 0.2796   |
| YMR138W   | 0.1379                      | 0.1320 | 0.0877 |        | 0.1073   | 0.3793                    | 0.2115 | 0.3494 |        | 0.0697   |
| YHL033C   | 0.1064                      | 0.1053 | 0.0720 | 0.0967 | 0.0849   | 0.3174                    | 0.3839 | 0.2885 | 0.1811 | 0.2394   |
| YNL025C   | 0.1073                      | 0.1073 | 0.0823 | 0.0913 | 0.0905   | 0.3607                    | 0.3123 | 0.3424 | 0.1793 | 0.2433   |
| YLR373C   | 0.1226                      | 0.1208 | 0.0794 | 0.1045 | 0.1005   | 0.4128                    | 0.4309 | 0.3267 | 0.2152 | 0.2483   |
| YBR126C   | 0.1183                      | 0.1374 | 0.0953 | 0.1359 | 0.0945   | 0.4653                    | 0.4538 | 0.4242 | 0.2308 | 0.3117   |
| YAL009W   | 0.1348                      | 0.1515 | 0.0794 | 0.1265 | 0.1063   | 0.4393                    | 0.5330 | 0.3701 | 0.2077 | 0.2917   |
| YMR224C   | 0.1371                      | 0.1219 | 0.0836 | 0.1087 | 0.0886   | 0.3927                    | 0.3628 | 0.4106 | 0.2440 | 0.2536   |
| YBR127C   | 0.1080                      | 0.1073 | 0.0995 | 0.1011 | 0.0963   | 0.3622                    | 0.4081 | 0.3129 | 0.1584 | 0.1868   |
| YPL178W   | 0.1231                      | 0.0976 | 0.0779 | 0.0903 | 0.0996   | 0.4836                    | 0.1987 | 0.3258 | 0.1945 | 0.2213   |
| YGL168W   | 0.0966                      | 0.0896 | 0.0685 | 0.0892 | 0.0838   | 0.3607                    | 0.2583 | 0.2730 | 0.2539 | 0.1555   |
| YBR073w   | 0.1193                      | 0.1334 | 0.0742 | 0.1184 | 0.1208   | 0.3675                    | 0.4149 | 0.3084 | 0.2590 | 0.2698   |
| YLR068W   | 0.1241                      | 0.1232 | 0.0934 | 0.1179 | 0.1029   | 0.3058                    | 0.3046 | 0.2702 | 0.2071 | 0.2551   |
| YIL009C-A | 0.1418                      | 0.1223 | 0.0943 | 0.1083 | 0.1169   | 0.3710                    | 0.3021 | 0.2878 | 0.2386 | 0.2783   |
| YLR087C   | 0.1424                      | 0.1382 | 0.0825 | 0.0995 | 0.1011   | 0.4275                    | 0.4257 | 0.3063 | 0.2805 | 0.3433   |
| YEL051W   | 0.1075                      | 0.0897 | 0.1075 |        | 0.0853   | 0.3305                    | 0.4019 | 0.3129 |        | 0.1819   |
| YER068W   | 0.1345                      | 0.0741 | 0.0561 | 0.1120 |          | 0.2304                    | 0.1444 | 0.2006 | 0.1101 |          |
| YHR183W   | 0.1221                      | 0.1439 | 0.0968 | 0.1255 | 0.1320   | 0.3841                    | 0.4781 | 0.3227 | 0.2601 | 0.2629   |
| YGL219C   | 0.1132                      | 0.1071 | 0.0947 | 0.1282 | 0.1118   | 0.4216                    | 0.4244 | 0.2970 | 0.1905 | 0.2331   |
| YBR289W   | 0.1358                      | 0.0891 | 0.1022 |        |          | 0.1324                    | 0.3351 | 0.1718 |        |          |
| YLR039C   | 0.1040                      | 0.0755 | 0.0911 | 0.0951 | 0.1161   | 0.4514                    | 0.1776 | 0.2867 | 0.1871 | 0.2015   |
| YCR071C   | 0.1122                      | 0.0918 | 0.0866 | 0.0870 | 0.0856   | 0.4774                    | 0.5025 | 0.3248 | 0.3406 | 0.2861   |
| YML032C   | 0.1056                      | 0.1065 | 0.0864 | 0.1070 | 0.0977   | 0.3577                    | 0.4310 | 0.2654 | 0.2698 | 0.1512   |
| YMR035W   | 0.1115                      | 0.1047 | 0.0834 | 0.0739 | 0.0942   | 0.4396                    | 0.5423 | 0.3269 | 0.2729 | 0.3017   |
