# Supplementary material for: Epistasis for Growth Rate and Total Metabolic Flux in Yeast
Source: PubMed Central journal article supplement (PMC3295780; doi:10.1371/journal.pone.0033132), 2012-03-06
Supplement: pone.0033132.s003.pdf [file pone.0033132.s003.pdf]

| <b>Cross</b> | <b>Marker</b> | <b>Deletion</b> | <b>MGR</b> | <b>D/G</b> |
|--------------|---------------|-----------------|------------|------------|
| 1            | kan           | YEL054C         | 0,4170     | 0,0972     |
|              | nat           | YAL026C         | 0,4587     | 0,0891     |
|              | kan nat       |                 | 0,3996     | 0,1009     |
|              | wt            |                 | 0,5631     | 0,0995     |
| 2            | kan           | YPL050C         | 0,4868     | 0,0974     |
|              | nat           | YML024W         | 0,5333     | 0,0998     |
|              | kan nat       |                 | 0,3852     | 0,0833     |
|              | wt            |                 | 0,5564     | 0,1008     |
| 3            | kan           | YLR386W         | 0,5468     | 0,0971     |
|              | nat           | YAL021C         | 0,4180     | 0,0955     |
|              | kan nat       |                 | 0,5078     | 0,0822     |
|              | wt            |                 | 0,5426     | 0,0990     |
| 4            | kan           | YNR036C         | 0,2377     | 0,1209     |
|              | nat           | YMR150C         | 0,4626     | 0,0953     |
|              | kan nat       |                 | 0,1790     | 0,1340     |
|              | wt            |                 | 0,5556     | 0,0986     |
| 5            | kan           | YAL009W         | 0,4586     | 0,1029     |
|              | nat           | YMR224C         | 0,4488     | 0,0856     |
|              | kan nat       |                 | 0,3899     | 0,0848     |
|              | wt            |                 | 0,5516     | 0,0992     |
| 6            | kan           | YAL020C         | 0,5366     | 0,1024     |
|              | nat           | YMR228W         | 0,4976     | 0,0824     |
|              | kan nat       |                 | 0,4916     | 0,0697     |
|              | wt            |                 | 0,5514     | 0,0998     |
| 7            | kan           | YIL103W         | 0,5005     | 0,0925     |
|              | nat           | YMR021c         | 0,5080     | 0,0889     |
|              | kan nat       |                 | 0,4577     | 0,0935     |
|              | wt            |                 | 0,5537     | 0,0892     |
| 8            | kan           | YPL031C         | 0,3327     | 0,1015     |
|              | nat           | YMR035W         | 0,4443     | 0,0930     |
|              | kan nat       |                 | 0,3795     | 0,0859     |
|              | wt            |                 | 0,4956     | 0,1173     |
| 9            | kan           | YOL095C         | 0,4992     | 0,0885     |
|              | nat           | YMR287C         | 0,4522     | 0,0929     |
|              | kan nat       |                 | 0,3222     | 0,0906     |
|              | wt            |                 | 0,5303     | 0,1052     |
| 10           | kan           | YOR026W         | 0,3856     | 0,0888     |
|              | nat           | YNL297C         | 0,5138     | 0,0977     |
|              | kan nat       |                 | 0,3883     | 0,0869     |
|              | wt            |                 | 0,5220     | 0,1031     |
| 11           | kan           | YPR101W         | 0,3856     | 0,1154     |
|              | nat           | YOL023W         | 0,4721     | 0,0820     |
|              | kan nat       |                 | 0,3674     | 0,0905     |

|    |         |         |        |        |
|----|---------|---------|--------|--------|
|    | wt      |         | 0,5496 | 0,0962 |
| 12 | kan     | YOR295W | 0,3508 | 0,1138 |
|    | nat     | YEL024W | 0,3128 | 0,1075 |
|    | kan nat |         | 0,2787 | 0,1089 |
|    | wt      |         | 0,5505 | 0,0890 |
| 13 | kan     | YKR024C | 0,4018 | 0,1056 |
|    | nat     | YEL050C | 0,3524 | 0,0867 |
|    | kan nat |         | 0,2792 | 0,0841 |
|    | wt      |         | 0,5422 | 0,0984 |
| 14 | kan     | YDR300C | 0,4973 | 0,0888 |
|    | nat     | YHR203C | 0,4999 | 0,0974 |
|    | kan nat |         | 0,4586 | 0,0870 |
|    | wt      |         | 0,5438 | 0,0956 |
| 15 | kan     | YCR081W | 0,4795 | 0,0913 |
|    | nat     | YCR003W | 0,4361 | 0,0869 |
|    | kan nat |         | 0,3723 | 0,0824 |
|    | wt      |         | 0,5470 | 0,0980 |
| 16 | kan     | YIL065C | 0,3203 | 0,0999 |
|    | nat     | YLR201C | 0,5366 | 0,0851 |
|    | kan nat |         | 0,2567 | 0,1258 |
|    | wt      |         | 0,5657 | 0,1072 |
| 17 | kan     | YMR038C | 0,5057 | 0,0974 |
|    | nat     | YCR009C | 0,5125 | 0,1076 |
|    | kan nat |         | 0,4804 | 0,0929 |
|    | wt      |         | 0,5395 | 0,1030 |
| 18 | kan     | YBR194W | 0,3555 | 0,1143 |
|    | nat     | YKL113C | 0,4877 | 0,0836 |
|    | kan nat |         | 0,3425 | 0,0941 |
|    | wt      |         | 0,5434 | 0,1165 |
| 19 | kan     | YHR021C | 0,2355 | 0,1062 |
|    | nat     | YPL271W | 0,4215 | 0,1024 |
|    | kan nat |         | 0,1506 | 0,1080 |
|    | wt      |         | 0,5268 | 0,1200 |
| 20 | kan     | YNL138W | 0,4438 | 0,1000 |
|    | nat     | YPL234C | 0,4047 | 0,1014 |
|    | kan nat |         | 0,3571 | 0,1186 |
|    | wt      |         | 0,5348 | 0,1097 |
| 21 | kan     | YDL081C | 0,5111 | 0,1037 |
|    | nat     | YPL174C | 0,5257 | 0,1072 |
|    | kan nat |         | 0,5006 | 0,1120 |
|    | wt      |         | 0,5341 | 0,1127 |
| 22 | kan     | YDR432W | 0,4681 | 0,0813 |
|    | nat     | YBR181C | 0,4029 | 0,0778 |
|    | kan nat |         | 0,3286 | 0,0889 |
|    | wt      |         | 0,5262 | 0,0851 |
| 23 | kan     | YPL059W | 0,4580 | 0,0895 |
|    | nat     | YDR069C | 0,4327 | 0,0974 |
|    | kan nat |         | 0,3211 | 0,0686 |
|    | wt      |         | 0,4961 | 0,1017 |

|    |         |           |        |        |
|----|---------|-----------|--------|--------|
| 24 | kan     | YOL076W   | 0,4031 | 0,1188 |
|    | nat     | YDR120C   | 0,5129 | 0,0895 |
|    | kan nat |           | 0,3373 | 0,0943 |
|    | wt      |           | 0,5280 | 0,0940 |
| 25 | kan     | YPL129W   | 0,4298 | 0,0774 |
|    | nat     | YDR127W   | 0,4476 | 0,0819 |
|    | kan nat |           | 0,3532 | 0,0928 |
|    | wt      |           | 0,5366 | 0,1260 |
| 26 | kan     | YJL176C   | 0,4854 | 0,0878 |
|    | nat     | YDR377W   | 0,4886 | 0,0830 |
|    | kan nat |           | 0,3852 | 0,0907 |
|    | wt      |           | 0,5337 | 0,0890 |
| 27 | kan     | YHL027W   | 0,3181 | 0,1073 |
|    | nat     | YDR378C   | 0,3988 | 0,0983 |
|    | kan nat |           | 0,2853 | 0,0986 |
|    | wt      |           | 0,5238 | 0,1009 |
| 28 | kan     | YOR293W   | 0,3692 | 0,0945 |
|    | nat     | YKL134C   | 0,4671 | 0,0797 |
|    | kan nat |           | 0,3052 | 0,0749 |
|    | wt      |           | 0,5292 | 0,0886 |
| 29 | kan     | YJR134C   | 0,4362 | 0,0828 |
|    | nat     | YOR205C   | 0,4805 | 0,0922 |
|    | kan nat |           | 0,4231 | 0,0903 |
|    | wt      |           | 0,5505 | 0,0908 |
| 30 | kan     | YNL284C   | 0,4900 | 0,1104 |
|    | nat     | YLR372W   | 0,4980 | 0,1017 |
|    | kan nat |           | 0,5072 | 0,0891 |
|    | wt      |           | 0,5540 | 0,1164 |
| 31 | kan     | YAL010C   | 0,2504 | 0,1188 |
|    | nat     | YDR197W   | 0,4771 | 0,1050 |
|    | kan nat |           | 0,1969 | 0,0927 |
|    | wt      |           | 0,5383 | 0,0990 |
| 32 | kan     | YEL036C   | 0,5296 | 0,1093 |
|    | nat     | YDR231C   | 0,4928 | 0,1000 |
|    | kan nat |           | 0,4972 | 0,0966 |
|    | wt      |           | 0,5376 | 0,1043 |
| 33 | kan     | YLR234W   | 0,4362 | 0,1098 |
|    | nat     | YPR191W   | 0,4956 | 0,1002 |
|    | kan nat |           | 0,3995 | 0,1005 |
|    | wt      |           | 0,5197 | 0,0965 |
| 34 | kan     | YER014C-A | 0,4721 | 0,0985 |
|    | nat     | YHR026W   | 0,3787 | 0,1162 |
|    | kan nat |           | 0,3694 | 0,1029 |
|    | wt      |           | 0,5446 | 0,1050 |
| 35 | kan     | YFR001W   | 0,4192 | 0,1011 |
|    | nat     | YKR092C   | 0,4455 | 0,0951 |
|    | kan nat |           | 0,3486 | 0,0897 |
|    | wt      |           | 0,4932 | 0,0963 |
| 36 | kan     | YDR495c   | 0,2684 | 0,1215 |

|    |         |         |        |        |
|----|---------|---------|--------|--------|
|    | nat     | YGL084C | 0,4624 | 0,1079 |
|    | kan nat |         | 0,3247 | 0,1205 |
|    | wt      |         | 0,5299 | 0,1161 |
| 37 | kan     | YPR159W | 0,5022 | 0,1146 |
|    | nat     | YJL056C | 0,4742 | 0,0947 |
|    | kan nat |         | 0,5109 | 0,1110 |
|    | wt      |         | 0,5322 | 0,1066 |
| 38 | kan     | YGL038C | 0,4964 | 0,1071 |
|    | nat     | YLR425W | 0,4383 | 0,1100 |
|    | kan nat |         | 0,4780 | 0,1010 |
|    | wt      |         | 0,5418 | 0,1076 |
| 39 | kan     | YDR225w | 0,4297 | 0,0867 |
|    | nat     | YLR448W | 0,2410 | 0,1240 |
|    | kan nat |         | 0,2431 | 0,1068 |
|    | wt      |         | 0,4923 | 0,1021 |
| 40 | kan     | YMR214W | 0,5206 | 0,0941 |
|    | nat     | YMR060C | 0,3448 | 0,0974 |
|    | kan nat |         | 0,2674 | 0,1222 |
|    | wt      |         | 0,4991 | 0,0975 |
| 41 | kan     | YOR270C | 0,4695 | 0,0851 |
|    | nat     | YJR104C | 0,4807 | 0,0865 |
|    | kan nat |         | 0,4587 | 0,1122 |
|    | wt      |         | 0,5601 | 0,1047 |
| 42 | kan     | YBR251W | 0,3612 | 0,1112 |
|    | nat     | YDL191W | 0,4198 | 0,1129 |
|    | kan nat |         | 0,2483 | 0,1054 |
|    | wt      |         | 0,5273 | 0,1059 |
| 43 | kan     | YLR423C | 0,5545 | 0,1235 |
|    | nat     | YDL192W | 0,4177 | 0,1024 |
|    | kan nat |         | 0,4154 | 0,1079 |
|    | wt      |         | 0,5470 | 0,0913 |
| 44 | kan     | YDR268W | 0,4688 | 0,1087 |
|    | nat     | YDR028C | 0,4059 | 0,0876 |
|    | kan nat |         | 0,4032 | 0,0933 |
|    | wt      |         | 0,5366 | 0,1065 |
| 45 | kan     | YMR138W | 0,4501 | 0,1014 |
|    | nat     | YCR024C | 0,5001 | 0,0992 |
|    | kan nat |         | 0,4378 | 0,0738 |
|    | wt      |         | 0,5617 | 0,0878 |
| 46 | kan     | YDR138W | 0,5283 | 0,0900 |
|    | nat     | YCR034W | 0,4720 | 0,1074 |
|    | kan nat |         | 0,4363 | 0,1172 |
|    | wt      |         | 0,5605 | 0,1117 |
| 47 | kan     | YHL033C | 0,3748 | 0,1031 |
|    | nat     | YNL025C | 0,4223 | 0,0919 |
|    | kan nat |         | 0,3971 | 0,0960 |
|    | wt      |         | 0,5342 | 0,1125 |
| 48 | kan     | YBR266C | 0,5200 | 0,0996 |
|    | nat     | YNL037C | 0,4943 | 0,0965 |

|    |         |         |        |        |
|----|---------|---------|--------|--------|
|    | kan nat |         | 0,4485 | 0,1116 |
|    | wt      |         | 0,5553 | 0,1047 |
| 49 | kan     | YHR059W | 0,3043 | 0,0632 |
|    | nat     | YNR052C | 0,3909 | 0,1156 |
|    | kan nat |         | 0,3396 | 0,0795 |
|    | wt      |         | 0,5414 | 0,0881 |
| 50 | kan     | YBL079w | 0,2929 | 0,0912 |
|    | nat     | YPR043W | 0,4148 | 0,0731 |
|    | kan nat |         | 0,2425 | 0,0705 |
|    | wt      |         | 0,5483 | 0,1083 |
| 51 | kan     | YLR373C | 0,4568 | 0,0811 |
|    | nat     | YBR126C | 0,4830 | 0,0873 |
|    | kan nat |         | 0,4675 | 0,0890 |
|    | wt      |         | 0,5506 | 0,0902 |
| 52 | kan     | YLR239C | 0,5119 | 0,0883 |
|    | nat     | YBR127C | 0,3737 | 0,0917 |
|    | kan nat |         | 0,3423 | 0,0860 |
|    | wt      |         | 0,5627 | 0,0910 |
| 53 | kan     | YNL139C | 0,5575 | 0,0948 |
|    | nat     | YDR529C | 0,4975 | 0,0828 |
|    | kan nat |         | 0,4837 | 0,0843 |
|    | wt      |         | 0,5758 | 0,1066 |
| 54 | kan     | YLR268W | 0,4908 | 0,0840 |
|    | nat     | YGL105W | 0,3711 | 0,0693 |
|    | kan nat |         | 0,3263 | 0,0886 |
|    | wt      |         | 0,5665 | 0,1002 |
| 55 | kan     | YDL115C | 0,3325 | 0,1230 |
|    | nat     | YGL167C | 0,2986 | 0,0785 |
|    | kan nat |         | 0,3218 | 0,0923 |
|    | wt      |         | 0,5245 | 0,0945 |
| 56 | kan     | YPL178W | 0,4664 | 0,0856 |
|    | nat     | YGL168W | 0,4407 | 0,0809 |
|    | kan nat |         | 0,3953 | 0,0977 |
|    | wt      |         | 0,5853 | 0,0880 |
| 57 | kan     | YGR081C | 0,4512 | 0,0948 |
|    | nat     | YER141W | 0,4583 | 0,1118 |
|    | kan nat |         | 0,3791 | 0,1073 |
|    | wt      |         | 0,5263 | 0,0935 |
| 58 | kan     | YLR318W | 0,5269 | 0,1044 |
|    | nat     | YER153C | 0,4990 | 0,1003 |
|    | kan nat |         | 0,4559 | 0,0787 |
|    | wt      |         | 0,5612 | 0,0870 |
| 59 | kan     | YGR188C | 0,4318 | 0,0765 |
|    | nat     | YLL033W | 0,4114 | 0,0770 |
|    | kan nat |         | 0,4420 | 0,0845 |
|    | wt      |         | 0,5594 | 0,0830 |
| 60 | kan     | YMR205C | 0,3456 | 0,0833 |
|    | nat     | YLR061W | 0,3833 | 0,1013 |
|    | kan nat |         | 0,3329 | 0,0771 |

|    |         |           |        |        |
|----|---------|-----------|--------|--------|
|    | wt      |           | 0,5734 | 0,0832 |
| 61 | kan     | YNL107W   | 0,3960 | 0,0835 |
|    | nat     | YLR067C   | 0,3787 | 0,0925 |
|    | kan nat |           | 0,3655 | 0,1276 |
|    | wt      |           | 0,5677 | 0,0925 |
| 62 | kan     | YBR073w   | 0,4178 | 0,0849 |
|    | nat     | YLR068W   | 0,3537 | 0,1239 |
|    | kan nat |           | 0,4035 | 0,0727 |
|    | wt      |           | 0,5639 | 0,0894 |
| 63 | kan     | YIL009C-A | 0,3150 | 0,1212 |
|    | nat     | YLR087C   | 0,4680 | 0,0902 |
|    | kan nat |           | 0,2611 | 0,1125 |
|    | wt      |           | 0,5399 | 0,1114 |
| 64 | kan     | YKL204W   | 0,4504 | 0,0909 |
|    | nat     | YML007W   | 0,4399 | 0,0878 |
|    | kan nat |           | 0,3330 | 0,0801 |
|    | wt      |           | 0,5443 | 0,0945 |
| 65 | kan     | YOR014W   | 0,3571 | 0,0939 |
|    | nat     | YOL041C   | 0,4660 | 0,1062 |
|    | kan nat |           | 0,3478 | 0,1131 |
|    | wt      |           | 0,5370 | 0,1106 |
| 66 | kan     | YBR173C   | 0,4809 | 0,0883 |
|    | nat     | YEL051W   | 0,3632 | 0,0820 |
|    | kan nat |           | 0,3215 | 0,0773 |
|    | wt      |           | 0,5291 | 0,0921 |
| 67 | kan     | YOR309C   | 0,5389 | 0,1075 |
|    | nat     | YER068W   | 0,1942 | 0,0983 |
|    | kan nat |           | 0,1911 | 0,1041 |
|    | wt      |           | 0,5461 | 0,1172 |
| 68 | kan     | YGR063C   | 0,2983 | 0,1121 |
|    | nat     | YGR215W   | 0,3741 | 0,0915 |
|    | kan nat |           | 0,2557 | 0,1074 |
|    | wt      |           | 0,5570 | 0,0982 |
| 69 | kan     | YIR009W   | 0,5113 | 0,0853 |
|    | nat     | YHR060w   | 0,3969 | 0,0993 |
|    | kan nat |           | 0,4013 | 0,0873 |
|    | wt      |           | 0,5324 | 0,0866 |
| 70 | kan     | YDR418W   | 0,5067 | 0,0800 |
|    | nat     | YHR081W   | 0,3818 | 0,0714 |
|    | kan nat |           | 0,3976 | 0,0795 |
|    | wt      |           | 0,5403 | 0,0865 |
| 71 | kan     | YOR182C   | 0,3052 | 0,0833 |
|    | nat     | YLR139C   | 0,4824 | 0,0913 |
|    | kan nat |           | 0,2466 | 0,0802 |
|    | wt      |           | 0,5455 | 0,1002 |
| 72 | kan     | YNL008C   | 0,5288 | 0,0904 |
|    | nat     | YKL119C   | 0,2096 | 0,1417 |
|    | kan nat |           | 0,1887 | 0,1254 |
|    | wt      |           | 0,5665 | 0,0848 |

|    |         |           |        |        |
|----|---------|-----------|--------|--------|
| 73 | kan     | YHR183W   | 0,4153 | 0,1013 |
|    | nat     | YDR159W   | 0,3568 | 0,0790 |
|    | kan nat |           | 0,3696 | 0,0958 |
|    | wt      |           | 0,5429 | 0,0872 |
| 74 | kan     | YGL219C   | 0,4545 | 0,0830 |
|    | nat     | YDR204W   | 0,4812 | 0,0790 |
|    | kan nat |           | 0,3642 | 0,0745 |
|    | wt      |           | 0,5460 | 0,0925 |
| 75 | kan     | YMR304w   | 0,4575 | 0,1150 |
|    | nat     | YPL086C   | 0,4445 | 0,0678 |
|    | kan nat |           | 0,3250 | 0,0738 |
|    | wt      |           | 0,5561 | 0,0892 |
| 76 | kan     | YML010W-A | 0,4438 | 0,0922 |
|    | nat     | YGL071W   | 0,4731 | 0,0950 |
|    | kan nat |           | 0,4143 | 0,0812 |
|    | wt      |           | 0,5466 | 0,0968 |
| 77 | kan     | YBR289W   | 0,4117 | 0,0780 |
|    | nat     | YGL058W   | 0,4824 | 0,0764 |
|    | kan nat |           | 0,3073 | 0,0947 |
|    | wt      |           | 0,4903 | 0,0895 |
| 78 | kan     | YMR089C   | 0,4938 | 0,0954 |
|    | nat     | YGL064C   | 0,4997 | 0,0774 |
|    | kan nat |           | 0,4367 | 0,0865 |
|    | wt      |           | 0,5404 | 0,0921 |
| 79 | kan     | YAR002W   | 0,4341 | 0,0766 |
|    | nat     | YMR078C   | 0,4722 | 0,0878 |
|    | kan nat |           | 0,3793 | 0,0797 |
|    | wt      |           | 0,5451 | 0,0889 |
| 80 | kan     | YER087W   | 0,3515 | 0,0742 |
|    | nat     | YOL096C   | 0,4738 | 0,0799 |
|    | kan nat |           | 0,2063 | 0,0835 |
|    | wt      |           | 0,5030 | 0,0851 |
| 81 | kan     | YJL140W   | 0,5211 | 0,0931 |
|    | nat     | YHL025W   | 0,4013 | 0,0805 |
|    | kan nat |           | 0,3917 | 0,0646 |
|    | wt      |           | 0,5406 | 0,1343 |
| 82 | kan     | YDR025W   | 0,5469 | 0,1096 |
|    | nat     | YLR039C   | 0,4108 | 0,1079 |
|    | kan nat |           | 0,4437 | 0,1037 |
|    | wt      |           | 0,5552 | 0,1110 |
| 83 | kan     | YPL036w   | 0,5498 | 0,0972 |
|    | nat     | YML121w   | 0,5088 | 0,0986 |
|    | kan nat |           | 0,4709 | 0,1006 |
|    | wt      |           | 0,5574 | 0,0998 |
| 84 | kan     | YOR241W   | 0,4282 | 0,0777 |
|    | nat     | YPR036W   | 0,4520 | 0,0969 |
|    | kan nat |           | 0,3841 | 0,0809 |
|    | wt      |           | 0,5059 | 0,1061 |
| 85 | kan     | YLR312W-A | 0,4863 | 0,1143 |

|    |         |         |        |        |
|----|---------|---------|--------|--------|
|    | nat     | YJR063W | 0,4965 | 0,0940 |
|    | kan nat |         | 0,4500 | 0,1006 |
|    | wt      |         | 0,5382 | 0,0978 |
| 86 | kan     | YBL099W | 0,4364 | 0,0838 |
|    | nat     | YCR071C | 0,3284 | 0,0991 |
|    | kan nat |         | 0,3246 | 0,0737 |
|    | wt      |         | 0,4873 | 0,0865 |
| 87 | kan     | YGR180C | 0,3054 | 0,0975 |
|    | nat     | YNL079C | 0,4032 | 0,0814 |
|    | kan nat |         | 0,3090 | 0,0655 |
|    | wt      |         | 0,4772 | 0,0919 |
| 88 | kan     | YMR272C | 0,5284 | 0,0843 |
|    | nat     | YKL139W | 0,4083 | 0,0874 |
|    | kan nat |         | 0,3108 | 0,0704 |
|    | wt      |         | 0,5413 | 0,0881 |
| 89 | kan     | YML032C | 0,3599 | 0,0906 |
|    | nat     | YDL033C | 0,4961 | 0,0956 |
|    | kan nat |         | 0,3894 | 0,1049 |
|    | wt      |         | 0,5504 | 0,0711 |
| 90 | kan     | YDL117W | 0,4618 | 0,1091 |
|    | nat     | YGL163C | 0,4416 | 0,0769 |
|    | kan nat |         | 0,3284 | 0,0916 |
|    | wt      |         | 0,5185 | 0,1010 |
| 91 | kan     | YKL170W | 0,4644 | 0,1191 |
|    | nat     | YLR069C | 0,3772 | 0,0838 |
|    | kan nat |         | 0,3172 | 0,0874 |
|    | wt      |         | 0,5383 | 0,0902 |
| 92 | kan     | YBR189W | 0,4873 | 0,0811 |
|    | nat     | YDR450W | 0,3750 | 0,0855 |
|    | kan nat |         | 0,4245 | 0,0971 |
|    | wt      |         | 0,5259 | 0,1122 |
| 93 | kan     | YNL001w | 0,4423 | 0,0983 |
|    | nat     | YJL102W | 0,5133 | 0,0828 |
|    | kan nat |         | 0,4763 | 0,0623 |
|    | wt      |         | 0,5366 | 0,1145 |
| 94 | kan     | YLR185W | 0,3909 | 0,1242 |
|    | nat     | YDR347W | 0,3459 | 0,0983 |
|    | kan nat |         | 0,3580 | 0,0660 |
|    | wt      |         | 0,5334 | 0,1090 |
| 95 | kan     | YJL189W | 0,4810 | 0,1171 |
|    | nat     | YPL239W | 0,4308 | 0,0959 |
|    | kan nat |         | 0,4044 | 0,0948 |
|    | wt      |         | 0,5479 | 0,0982 |
| 96 | kan     | YBR282W | 0,5513 | 0,0933 |
|    | nat     | YMR194W | 0,4547 | 0,0790 |
|    | kan nat |         | 0,4502 | 0,0979 |
|    | wt      |         | 0,5502 | 0,0838 |
